# Supplementary material for: Bimetallic Cu/Fe Catalysts for Ibuprofen Mineralization
Source: MDPI journal article supplement (doi:10.3390/catal11111383), 2021-11-16
Supplement: s1 [file s1]

## Bimetallic Cu/Fe Catalysts for Ibuprofen Mineralization

Sajid Hussain, Eleonora Aneggi \*, Daniele Goi and Alessandro Trovarelli

Dipartimento Politecnico di Ingegneria e Architettura, Università di Udine, Unità di Ricerca INSTM Udine, 33100 Udine Italy; hussain.sajid@spes.uniud.it (S.H.); danielle.goi@uniud.it (D.G.); alessandro.trovarelli@uniud.it (A.T.)

\* Correspondence: eleonora.aneggi@uniud.it; Tel.: +39-0432-558847

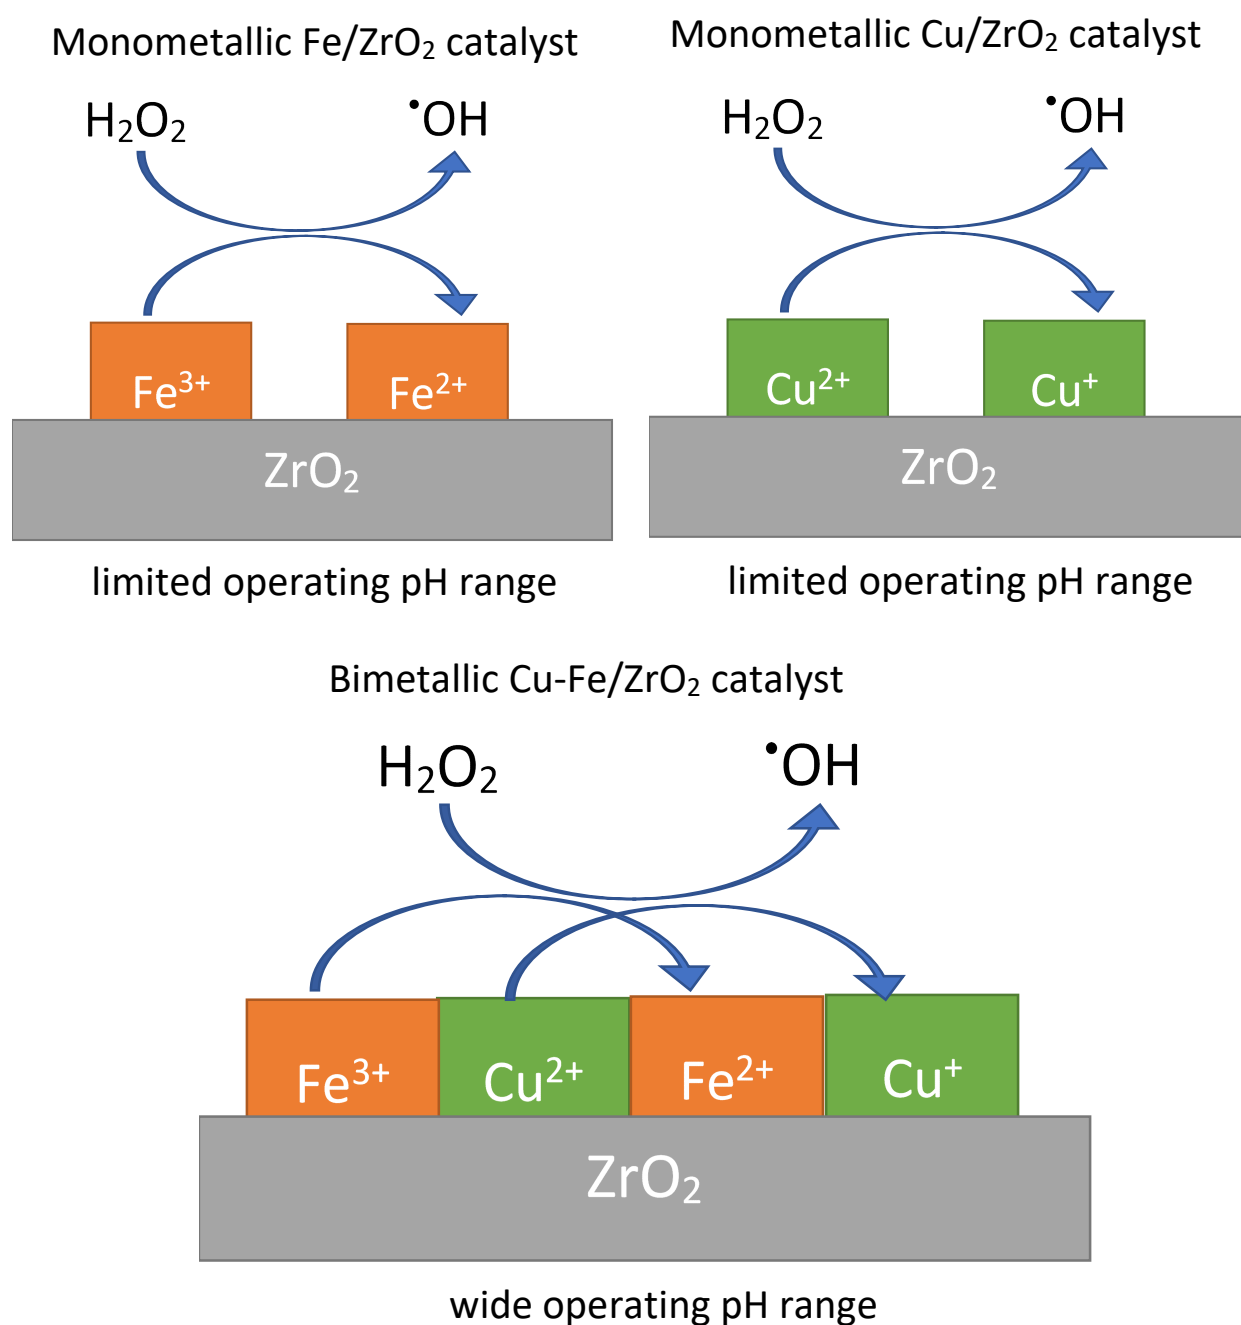

**Figure S1.** Qualitative representation of redox cycles in monometallic and bimetallic Cu-Fe catalysts.

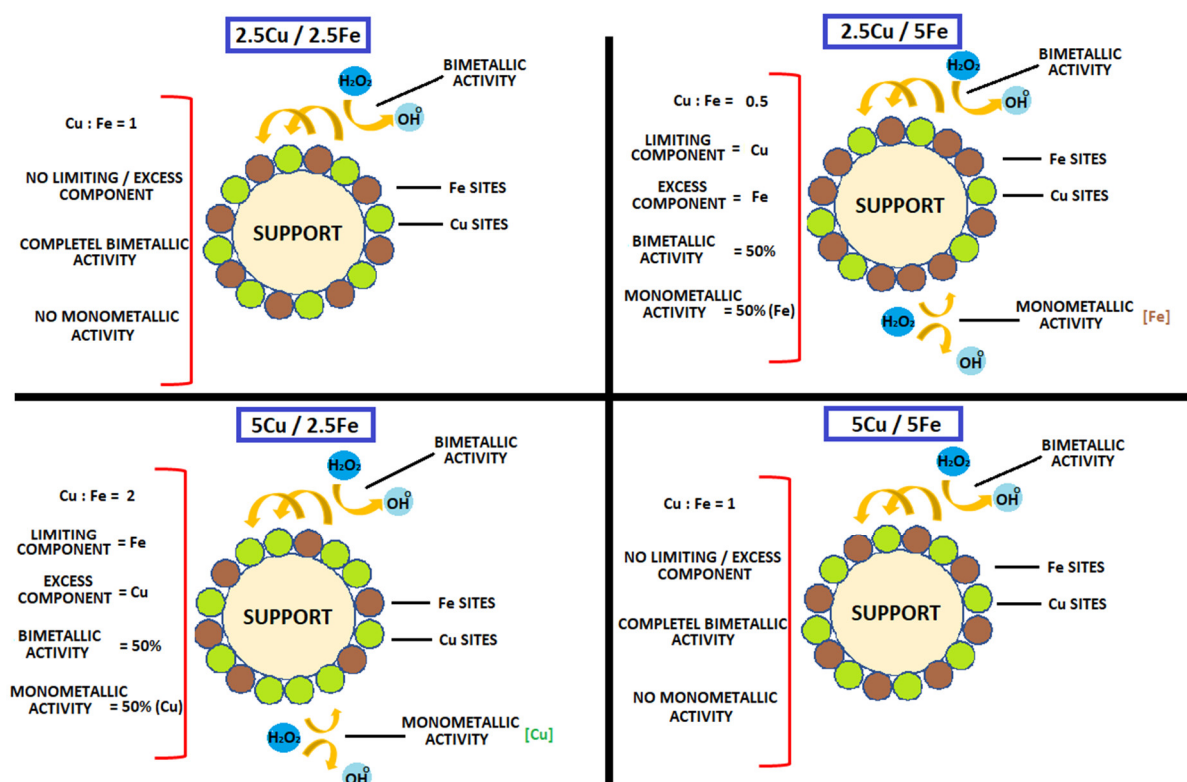

**Figure S2.** The extent of bimetallic and monometallic catalytic activity of the investigated catalysts.
